# Supplementary material
Source: PubMed Central journal article supplement (PMC3769885)
Supplement: neo1509_1064SD1.pdf [file neo1509_1064SD1.pdf]

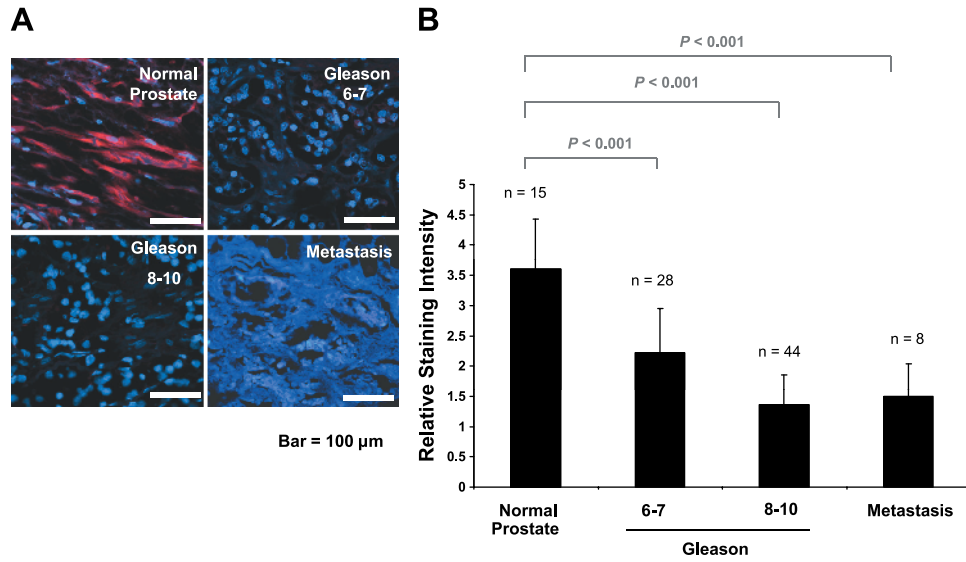

**Figure W1.** TBK1 is highly expressed in PCa cells. (A) PCa TMA sections were analyzed by immunofluorescence staining with phospho-p70S6K antibody. Representative micrographs of normal prostate and PCa (Gleason score) and bone metastases at  $\times 60$ . (B) Staining intensity was scored blindly as absent (1), weak (2), moderate (3), strong (4), and very strong (5).

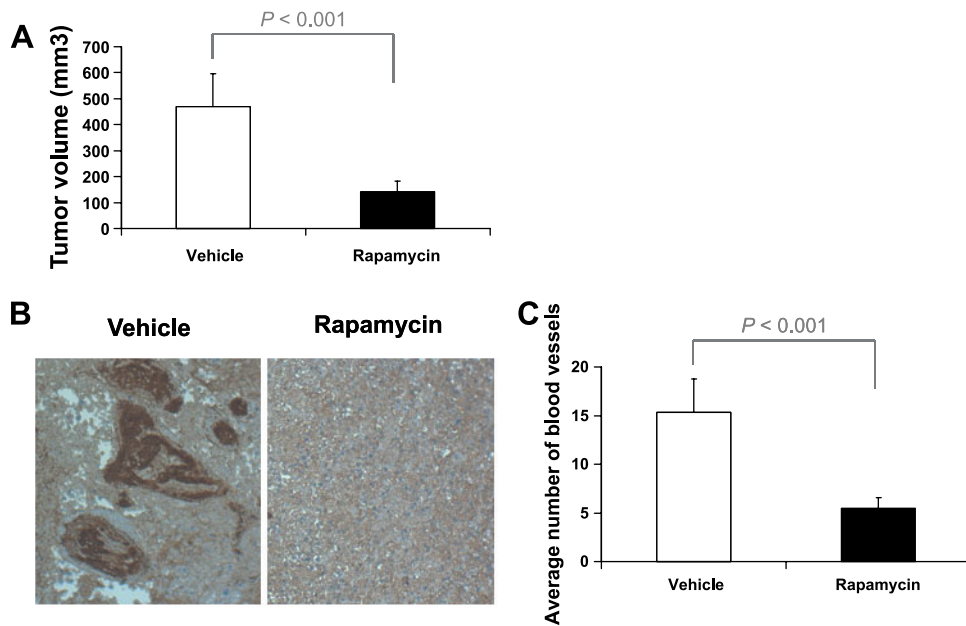

**Figure W2.** Rapamycin inhibits tumor growth and angiogenesis. PC3 cells were implanted in the flanks of SCID mice. Mice were treated with rapamycin or vehicle for 3 weeks ( $n = 8$ /group). (A) After 4 weeks, tumor volumes were measured and quantified. (B) Photomicrographs of histologic sections stained for factor VIII. (C) The number of microvessels was counted under light microscope at  $\times 200$  magnification.
